# Supplementary material for: Identification of endogenous migratory MSC-like cells and their interaction with the implant materials guiding osteochondral defect repair
Source: Royal Society of Chemistry journal article supplement (doi:10.1039/c9tb00674e), 2019-01-01
Supplement: c9tb00674e1.pdf [file c9tb00674e1.pdf]

## Identification of Endogenous Migratory MSC-like cells and Their Interaction with the Implant Materials Guiding Osteochondral Defect Repair

Yafang Chen, Mengcheng Ma, Hongfu Cao, Yuxiang Wang, Yang Xu, Yingying Teng, Yong Sun,\* Jie Liang, Yujiang Fan and Xingdong Zhang

National Engineering Research Center for Biomaterials, Sichuan University, 29 Wangjiang Road, Chengdu 610064, P. R. China

### Author information

#### Corresponding Author

\*Yong Sun

National Engineering Research Center for Biomaterials, Sichuan University, Chengdu 610064, China

Tel: +86-28-85417654 Fax: +86-28-85417654 E-mail: sunyong8702@scu.edu.cn

**Table S1.** Primary antibodies used in this study.

|             | Species           | Company           | Catalog    | Dilution |
|-------------|-------------------|-------------------|------------|----------|
| CD90        | Mouse monoclonal  | BD Pharmingen     | 554892     | 1:50     |
| CD73        | Mouse monoclonal  | BD Pharmingen     | 551123     | 1:100    |
| CD45        | Mouse monoclonal  | BD Pharmingen     | 550566     | 1:25     |
| CD105       | Mouse monoclonal  | USCN              | RPA980Ra01 | 1:30     |
| CD34        | Rabbit monoclonal | Abcam             | ab81289    | 1:200    |
| Collagen I  | Mouse monoclonal  | Novus Biologicals | NB600-450  | 1:800    |
| Collagen II | Mouse monoclonal  | Novus Biologicals | NBP2-33343 | 1:200    |
| Collagen X  | Mouse monoclonal  | Thermo Fisher     | X-AC9      | 1:50     |
